# Supplementary material
Source: PubMed Central journal article supplement (PMC2838339)
Supplement: supp_M109.084442_Supplementary_materials.pdf [file supp_M109.084442_Supplementary_materials.pdf]

**Supplementary Table 1. Crystallographic Statistics**

| Crystallographic data                |               |
|--------------------------------------|---------------|
| Source                               | 4A (HFMX)     |
| Wavelength, Å                        | 0.9797        |
| Resolution limits (Å)                | 50.0-2.3      |
| Space group                          | P321          |
| Unit cell <i>a</i> , <i>c</i> , (Å)  | 121.85, 33.58 |
| Total Reflections                    | 556,694       |
| Unique reflections                   | 13,136        |
| Completeness                         | 100 (100)     |
| R <sub>sym</sub> (%)                 | 8.3 (15.0)    |
| Average <i>I</i> /σ ( <i>I</i> )     | 31.3 (8.1)    |
| FOM                                  |               |
| after density modification           | 0.78          |
| With CNS                             |               |
| Refinement statistics                |               |
| Resolution range (Å)                 | 50.0-2.3      |
| R <sub>factor</sub> (%) <sup>b</sup> | 23.5          |
| R <sub>free</sub> (%) <sup>c</sup>   | 24.9          |
| Number of protein atoms              | 1,233         |
| Number of water molecules            | 57            |
| r.m.s.d. from ideality               |               |
| Bond length (Å)                      | 0.006         |
| Bond angles (°)                      | 1.374         |
| Ramachandran plot (%)                |               |
| Most favored                         | 92.9          |
| Additionally allowed                 | 7.1           |
| Generously allowed                   | 0             |

<sup>a</sup>  $R_{\text{sym}} = \sum |I_{\text{obs}} - I_{\text{avg}}| / I_{\text{obs}}$ , where  $I_{\text{obs}}$  is the observed intensity of individual reflection and  $I_{\text{avg}}$  is average over symmetry equivalents.

<sup>b</sup>  $R_{\text{cyst}} = \sum ||F_{\text{obs}}| - |F_{\text{calc}}|| / \sum |F_{\text{obs}}| \times 100$  for 95% of recorded data

<sup>c</sup>  $R_{\text{free}}$  is the *R*-factor calculated by using 5% of the reflection data chosen randomly and omitted from the start of refinement.

**Supplementary Table 2.** The Mutations of 4-1BBL residues predicted to mediate trimeric interactions and receptor binding

| <b>Trimer interface</b> |                            |                  |
|-------------------------|----------------------------|------------------|
| Residue number          | Binding portion with 4-1BB | Oligomeric state |
| Q89A                    | 55.2 %                     | Trimer           |
| L115G                   | 15.4 %                     | Trimer           |
| V140A                   | 89.7 %                     | Dimer            |
| F199A                   | 85.5 %                     | Trimer/Dimer     |
| H205A                   | 89.0 %                     | Trimer           |
| V240A                   | 63.4 %                     | Trimer           |
| P242K                   | 86.9 %                     | Trimer           |
| P242E                   | 88.3 %                     | Trimer           |
| P245D                   | 88.8 %                     | Trimer           |
| $\Delta$ 240-254        | Insoluble                  | Insoluble        |

| <b>Receptor binding sites from modeling</b>                                  |                            |                  |
|------------------------------------------------------------------------------|----------------------------|------------------|
| Residue number                                                               | Binding portion with 4-1BB | Oligomeric state |
| K127A                                                                        | 0.5 %                      | N/A              |
| Q227A                                                                        | 4.3 %                      | Trimer           |
| Q230A                                                                        | Insoluble                  | Insoluble        |
| <b>Receptor binding sites from comparision with other complex structures</b> |                            |                  |
| R171G                                                                        | 82.3 %                     | Trimer           |
| S172G                                                                        | 90.7 %                     | Trimer           |
| H205A                                                                        | 89.0 %                     | Trimer           |

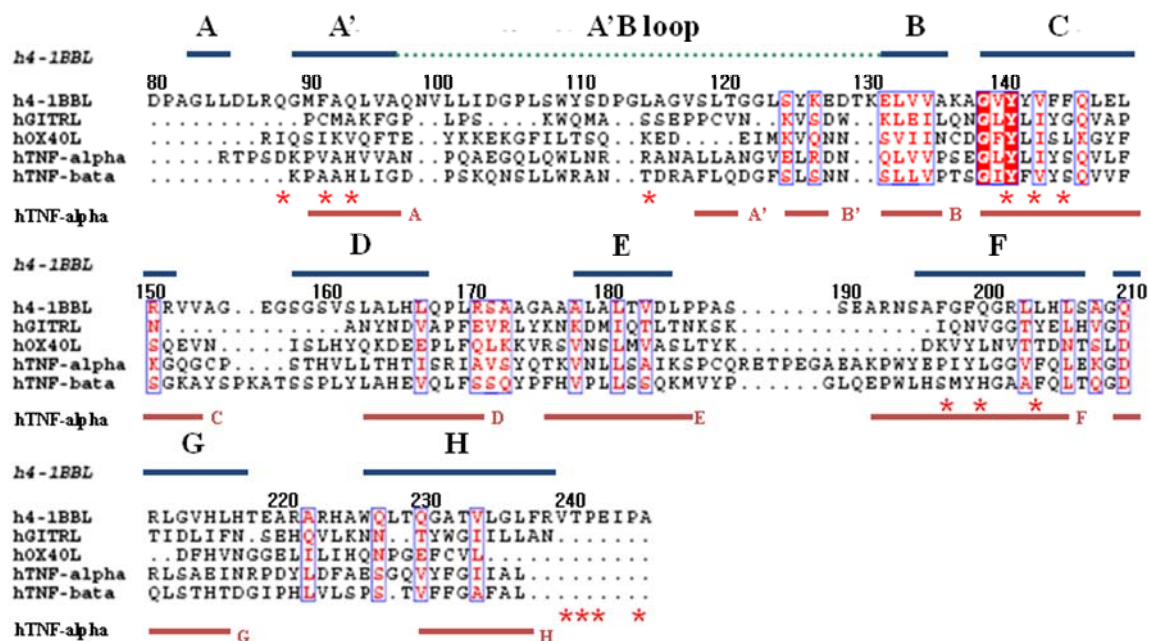

Supplementary Figure 1.

a

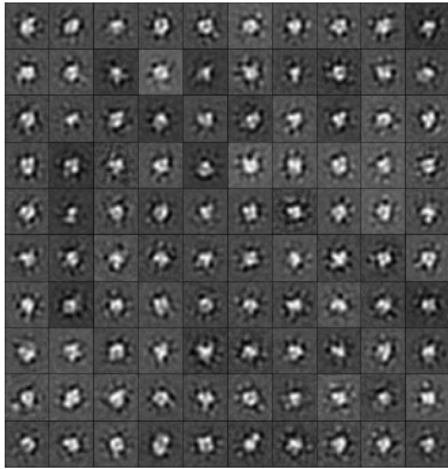

b

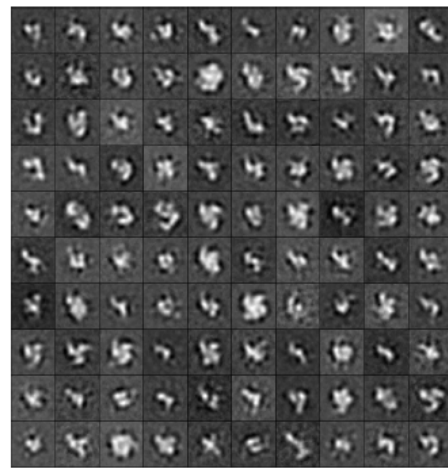

Supplementary Figure 2.

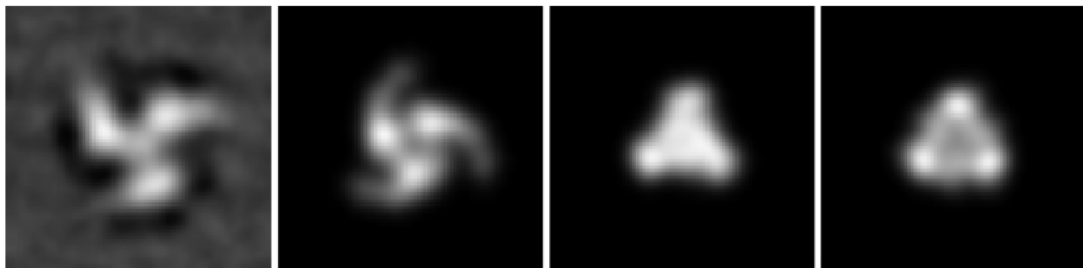

representative  
class average

4-1BB / 4-1BBL  
complex

TNF / TNFR  
complex

OX40 / OX40L  
complex

Supplementary Figure 3.
